# Supplementary material for: Identification of Inhibitors of ZIKV Replication
Source: MDPI journal article supplement (doi:10.3390/v12091041), 2020-09-18
Supplement: s1 [file s1]

# Supplementary Materials: Identification of Inhibitors of ZIKV Replication

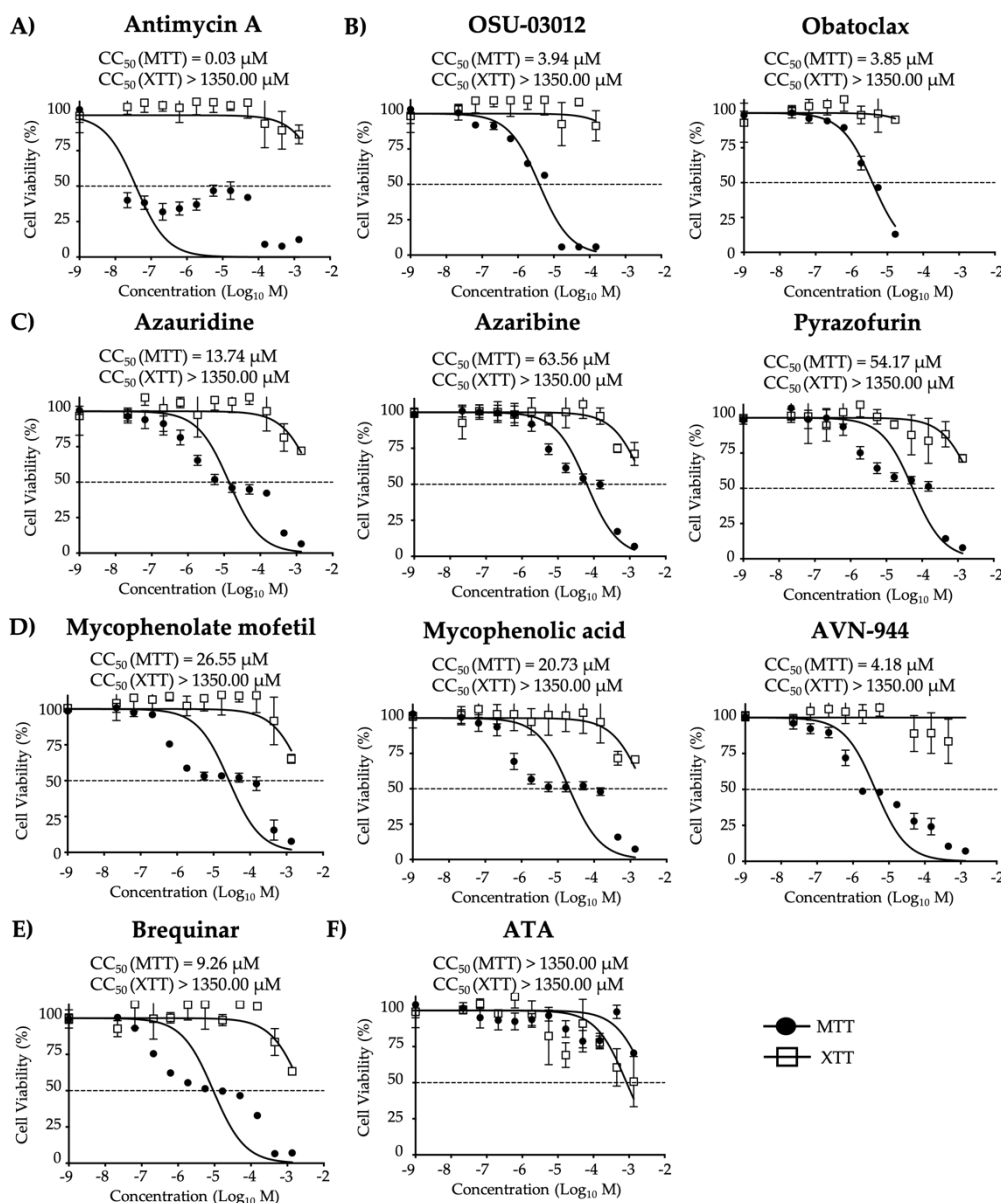

**Figure S1.** Cytotoxicity of the ten tested compounds: Vero cells (96-well plate format,  $5 \times 10^4$  cells/well, quadruplicates) were incubated with DMEM 5% FBS containing the indicated doses of the inhibitors (3-fold serial dilutions, starting concentration of 1350  $\mu M$ ) (A) Antimycin A, (B) OSU-03012 and Obatoclax, (C) Azaribine, Azauridine, and Pyrazofurin, (D) Mycophenolate mofetil, Mycophenolic acid, and AVN-944, (E) Brequinar, and (F) Aurintricarboxylic acid (ATA). Cell viability assays (MTT and XTT) were performed at 72 h post-treatment and the  $CC_{50}$  for each compound was calculated. Dotted line indicates the 50% toxicity of each of the compounds. Data was expressed as mean and SD from three independent experiments conducted in quadruplicates.

**Table S1.** Maximum effective concentration effects of the compounds post-, co-, and pre-treatment in Vero cells. MIC: maximum effective concentration.

| Compound              | Post-treatment MIC ( $\mu\text{M}$ ) | Co-treatment MIC ( $\mu\text{M}$ ) | Pre-treatment MIC ( $\mu\text{M}$ ) |
|-----------------------|--------------------------------------|------------------------------------|-------------------------------------|
| Antimycin A           | <100.00                              | >100.00                            | <100.00                             |
| OSU-03012             | <33.30                               | >100.00                            | <3.70                               |
| Obatoclax             | <0.01                                | <3.70                              | <11.10                              |
| Azaauridine           | >100.00                              | <100.00                            | >100.00                             |
| Azaribine             | >100.00                              | >100.00                            | >100.00                             |
| Pyrazofurin           | >100.00                              | >100.00                            | >100.00                             |
| Mycophenolate mofetil | >100.00                              | >100.00                            | >100.00                             |
| Mycophenolic acid     | >100.00                              | <11.10                             | >100.00                             |
| AVN-944               | <11.10                               | >100.00                            | <100.00                             |
| Brequinar             | >100.00                              | <33.30                             | >100.00                             |
| ATA                   | >100.00                              | <33.30                             | >100.00                             |

**Table S2.** Maximum effective concentration effects of the compounds with old World ZIKV MR-766 strain and new World ZIKV PRVABC59. MIC: maximum effective concentration.

| Compound              | MR766 MIC ( $\mu\text{M}$ ) | PRVABC59 MIC ( $\mu\text{M}$ ) |
|-----------------------|-----------------------------|--------------------------------|
| Antimycin A           | <33.30                      | <33.30                         |
| OSU-03012             | <11.10                      | >11.10                         |
| Obatoclax             | <1.23                       | <1.23                          |
| Azaauridine           | <3.70                       | <11.10                         |
| Azaribine             | <11.10                      | <11.10                         |
| Pyrazofurin           | <3.70                       | <3.70                          |
| Mycophenolate mofetil | <1.23                       | <1.23                          |
| Mycophenolic acid     | <1.23                       | <1.23                          |
| AVN-944               | <1.23                       | <1.23                          |
| Brequinar             | <0.13                       | <0.41                          |
| ATA                   | <33.30                      | <33.30                         |

**Table S3.** Maximum effective concentration effects of the compounds in A549 cells. MIC: maximum effective concentration.

| Compound              | A549 cells MIC ( $\mu\text{M}$ ) |
|-----------------------|----------------------------------|
| Antimycin A           | <11.10                           |
| OSU-03012             | <1.23                            |
| Obatoclax             | <1.23                            |
| Azaauridine           | <1.23                            |
| Azaribine             | <11.10                           |
| Pyrazofurin           | <1.23                            |
| Mycophenolate mofetil | <11.10                           |
| Mycophenolic acid     | <11.10                           |
| AVN-944               | <0.41                            |
| Brequinar             | <0.04                            |
| ATA                   | <100.00                          |
